# Supplementary figures and images for: Dopamine synthesis and dopamine receptor expression are disturbed in recurrent miscarriages
Source: PubMed Central journal article supplement — Endocr Connect. 2018 Apr 23;7(5):727–38. doi: 10.1530/EC-18-0126 (PMC5958746; doi:10.1530/ec-18-0126), 2018-04-23

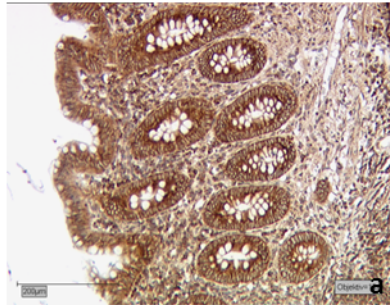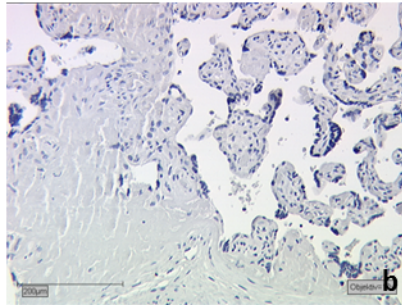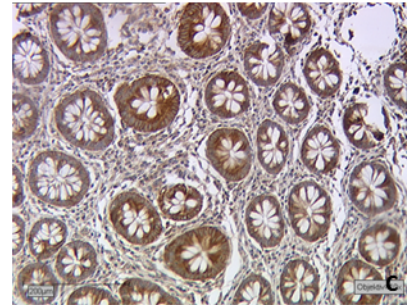

Supplement: ec-7-727-s001.pdf [file ec-7-727-s001.pdf]
